# Supplementary material for: Inequalities in the Use of Services Provided by Psychiatrists in Spain: A Multilevel Study
Source: Atypon-hosted journal article supplement (doi:10.1176/appi.ps.201100419), 2013-06-17

Online Appendix. Geographical distribution of psychiatric visits, GDP (Gross Domestic Product), Psychiatrists per 100 000 inhabitants working in hospitals and Human Resources (psychiatrist, psychologist and nursing) in the 17 Spanish regions (ACs).

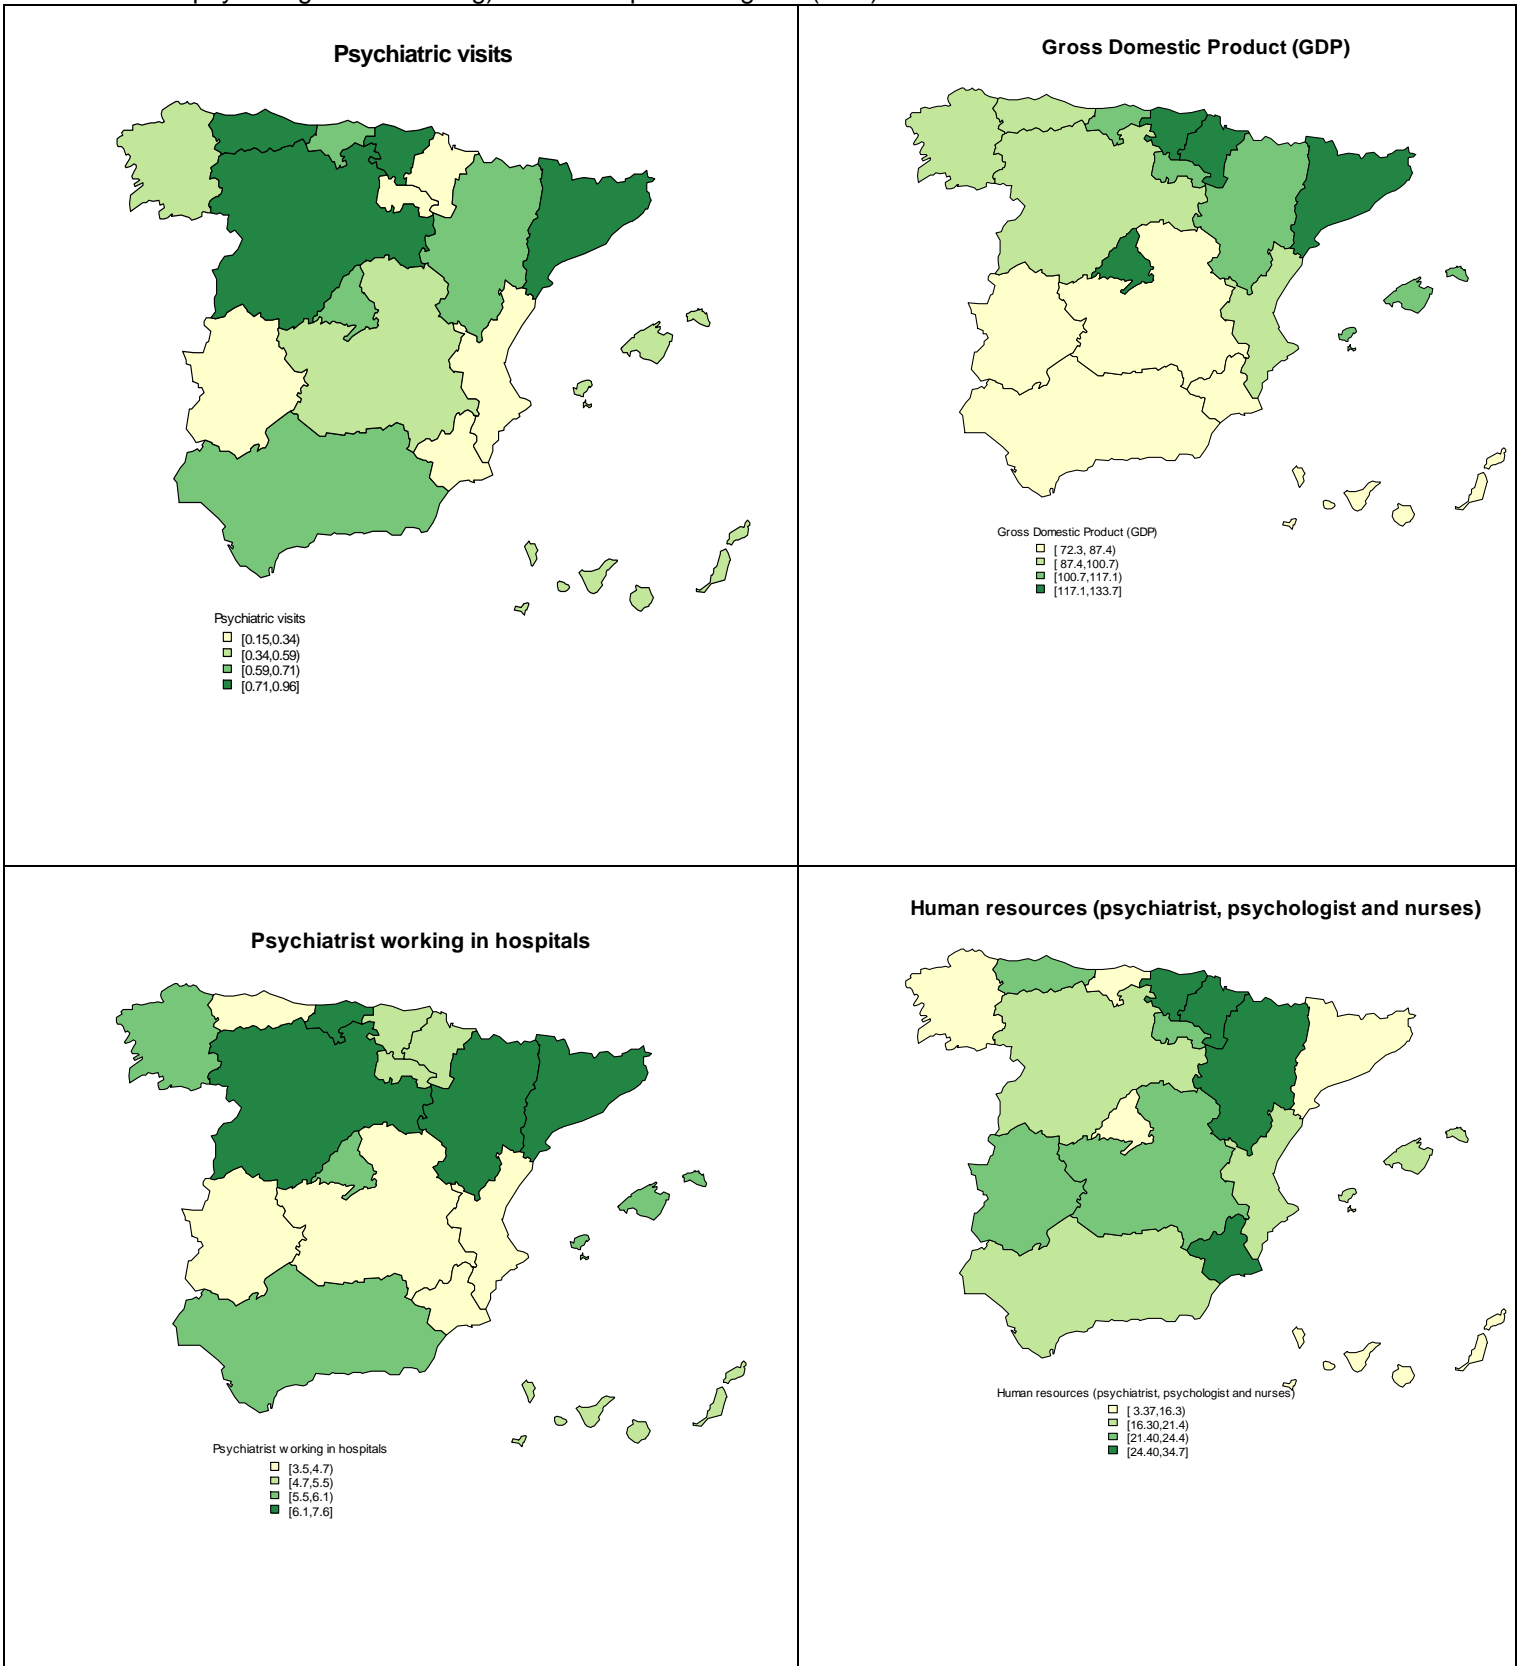

Supplement: 901_ds001.pdf [file 901_ds001.pdf]
