# Supplementary material for: Inequalities in the Use of Services Provided by Psychiatrists in Spain: A Multilevel Study
Source: Atypon-hosted journal article supplement (doi:10.1176/appi.ps.201100419), 2013-06-17
Supplement: 901_ds002.pdf [file 901_ds002.pdf]

# Desigualdades en el uso de los servicios prestados por psiquiatras en España: estudio a varios niveles

Kátia B. Rocha, Ph.D.  
Katherine Pérez, Ph.D.  
Maica Rodríguez-Sanz  
Jordi Alonso, M.D., Ph.D.  
Carles Muntaner, M.D., Ph.D.  
Carne Borrell, M.D., Ph.D.

*La Dra. Rocha trabaja en el Departamento de Psicología de la Pontificia Universidade Católica do Rio Grande do Sul, Avenida Ipiranga 6681, Porto Alegre, Rio Grande do Sul, Brasil (e-mail: katia.rocha@pucrs.br). La Dra. Rocha trabaja también en el Servicio de Sistemas de Información Sanitaria de la Agència de Salut Pública' de Barcelona, España, a la que están afiliadas la Dra. Pérez, la Sra. Rodríguez-Sanz y la Dra. Borrell. La Dra. Pérez, la Sra. Rodríguez-Sanz y la Dra. Borrell trabajan también para CIBER Epidemiología y Salud Pública, Madrid, España, institución a la que está afiliado el Dr. Alonso. El Dr. Alonso trabaja también en el Institut Hospital del Mar d'Investigacions Mèdiques, Barcelona, España. El Dr. Muntaner trabaja en la Bloomberg Faculty of Nursing y la Dalla Lana School of Public Health, Universidad de Toronto, Toronto, Ontario, Canadá.*

**Objetivo:** El objetivo era identificar las desigualdades individuales o contextuales en términos de visitas a psiquiatras en España, un país con un sistema de salud regionalizado y una integración variable entre la salud mental y la atención primaria. **Métodos:** En este estudio transversal se usaron datos procedentes de la Encuesta Nacional de Salud de España de 2006 referentes a la población no institucionalizada (N = 29,478). Las puntuaciones  $\geq 3$  en el Cuestionario de Salud General se usaron para indicar la necesidad de atención a la salud mental. La probabilidad de haber acudido a un psiquiatra en las cuatro semanas anteriores se analizó en relación con las variables individuales (edad, clase social, seguro médico y país de origen), con las variables socioeconómicas contextuales (producto interno bruto, un parámetro de la igualdad de los ingresos y las características de los sistemas de salud regionales, como recursos humanos, servicios y organización). Se utilizaron modelos de regresión logística de niveles múltiples. **Resultados:** En total, 161 personas (0.55% de la muestra) refirieron haber acudido a un psiquiatra en las cuatro semanas previas. Las probabilidades de referir una visita al psiquiatra fueron menores entre las personas de 65 años o más y los inmigrantes de países de ingresos bajos. Las visitas a psiquiatras fueron más frecuentes en las regiones con mayor índice de psiquiatras por hospital (razón de momios [OR – Odds Ratio] = 1.47, intervalo de confianza [IC] del 95% = 1.18 – 1.83), más recursos humanos de salud mental (OR = 1.03, IC = 1.01 – 1.06) y mejor integración de la atención primaria y la atención especializada a la salud mental (OR = 1.90, IC = 1.32 – 2.76). **Conclusiones:** En España existen desigualdades

individuales y contextuales en el uso de los servicios de psiquiatría. La mejor coordinación entre la atención primaria y la de salud mental, y la mayor disponibilidad de recursos de salud mental se asociaron a un uso mayor. Deberían promoverse políticas que buscasen una mejor integración asistencial. (*Psychiatric Services* 2013; doi: 10.1176/appi.ps.201100419)

Los trastornos mentales son un problema de salud pública con repercusiones importantes en términos de dependencia, incapacidad, morbilidad y costo económico (1-3). A pesar de su alta prevalencia y su efecto negativo sobre la salud pública en gran parte de los países, la mayoría de los trastornos mentales ni se previenen ni se diagnostican en sus primeras fases, en general no se tratan y el acceso a la atención de salud mental se considera insuficiente (4,5). Las personas de las regiones menos favorecidas desde el punto de vista socioeconómico tienen mayores tasas de morbilidad psiquiátrica y necesitan más servicios de salud mental, pero su acceso a los mismos es más limitado (6,7). Los factores que se asocian a la falta de tratamientos de salud mental son: un nivel socioeconómico bajo, tener más de 60 años, el sexo masculino (3,8-12) y ser inmigrante (13-15).

En 1986, España creó un Sistema Nacional de Salud (SNS) que se financia principalmente a través de los impuestos generales, cuenta con cobertura universal y está descentralizado entre las 17 Comunidades Autónomas (CA) del país (16). Creadas al amparo de la Constitución española de 1978, las CA son entidades territoriales dotadas de poderes legislativos y ejecutivos autónomos, y con poblaciones que van de los 300,000 habitantes (La Rioja) hasta casi los 8.5 millones (Andalucía). Las CA cuentan con distintos modelos de organización y diferentes niveles de financiamiento en cuanto a la atención de la salud mental.

El acceso al sistema de salud en España es universal, aunque las personas también pueden contratar seguros médicos privados complementarios (17). Aunque existen pocas desigualdades en el acceso a la atención primaria, las visitas a médicos especialistas son más probables entre las personas con seguros complementarios que entre quienes carecen de ellos (17,18). En consecuencia, a los sujetos sin seguros médicos privados complementarios y a los de menor nivel socioeconómico les resulta más difícil acceder a la atención especializada de salud mental.

En España, el sistema de atención a la salud primaria es el primer punto de contacto con el SNS y el que coordina los servicios de los distintos niveles (19). La atención primaria es la responsable de la prevención y la promoción de actividades y asesoría en el ámbito de la salud mental. También es la responsable de detectar, diagnosticar y tratar trastornos mentales, esencialmente la ansiedad y depresión. Cuando se sobrepasa la capacidad resolutive de los profesionales de atención primaria, los pacientes se derivan a servicios de salud mental. La atención especializada de salud mental cubre el diagnóstico clínico y el seguimiento de los trastornos mentales, la farmacoterapia, la psicoterapia individual, de grupo y familiar, la terapia electroconvulsiva y, en caso necesario, la hospitalización. Algunas de las dificultades que afectan a la prestación de cuidados a los problemas de salud mental en la atención primaria son la formación insuficiente de los médicos familiares en este campo, la demanda excesiva de servicios y la breve duración de las consultas (20).

El objetivo de la reforma psiquiátrica en España a principios de los años 1970 fue cerrar hospitales psiquiátricos. Bajo la bandera de la “desinstitucionalización”, este movimiento profesional perseguía la sustitución progresiva de los hospitales psiquiátricos por servicios de salud mental en clínicas comunitarias (21,22). Sin embargo, una apreciación reciente señalaba que el desarrollo histórico de los servicios de salud mental extrahospitalarios es insuficiente para las necesidades de la población española (21).

Las variaciones en la organización de la salud mental entre las CA puede representar una respuesta positiva a las diversas necesidades, pero también puede crear desigualdades en términos de gasto, acceso y utilización (22). El *Atlas de Salud Mental de la Organización Mundial de la Salud* subraya que no existen datos sobre el gasto de salud mental de todas las CA españolas (23). Sin embargo, los limitados datos disponibles indican que los niveles de financiamiento a la salud mental son bajos en España cuando se comparan con los de muchos de los 15 países de la Unión Europea. Por ejemplo, España tiene cuatro psiquiatras, dos psicólogos y cuatro enfermeros psiquiátricos por cada 10,000 habitantes, mientras que Suecia tiene 20, 76 y 32, respectivamente. Estas sorprendentes diferencias ilustran la amplia gama de niveles que posee la prestación de servicios de salud mental entre los distintos países europeos (23).

Se ha observado en varios países que una coordinación más eficiente entre la atención primaria y la especializada en salud mental se asocia a una mejor asistencia y mejores resultados clínicos (20,24-27). En España coexisten dos modelos de coordinación entre la atención primaria y la especializada en salud mental: el modelo de derivación, en que la atención primaria y la especializada en salud mental trabajan por separado, y el modelo de enlace en que los equipos de la atención especializada en salud mental cooperan con los profesionales de atención primaria y les dan apoyo (20). El nivel de coordinación entre la atención primaria y la especializada es menor en el modelo de derivación y mayor en el de enlace.

Varios estudios han observado desigualdades en la distribución de los recursos de salud mental entre las distintas CA, como por ejemplo el número de profesionales de salud mental por habitante, el presupuesto asignado específicamente a la salud mental (21,27,28) y el acceso a los recursos de salud mental (9,29). Estos estudios han hallado que el uso de los servicios de salud mental es en general mayor en las CA septentrionales que en las meridionales (9,29). Las diferencias entre las CA en cuanto al uso de la atención ambulatoria de salud mental son atribuibles a sus desiguales recursos de personal (9).

Las desigualdades relativas al empleo de servicios de salud mental en España se han estudiado únicamente a escala individual (3,5,8,9) y hay una gran escasez de información sobre la posible relación entre las variables individuales y contextuales y las desigualdades observadas en el uso de los servicios de salud mental. La distribución descentralizada que presentan en España los servicios de salud mental, con las correspondientes diferencias presupuestarias y de políticas entre las distintas CA, ofrece la oportunidad de poder comparar las distintas políticas. Más aún, el método “multinivel” también permite tomar en cuenta las variables socioeconómicas regionales e individuales.

La hipótesis principal de este estudio fue que existen desigualdades individuales y contextuales en el uso de los servicios psiquiátricos que son independientes de las necesidades de los pacientes. A escala individual se ha observado que los factores que se asocian a una menor probabilidad de acudir a un psiquiatra son: el nivel socioeconómico bajo, tener más de 60 años, ser varón (3,8-12) y ser inmigrante (13-15). Las investigaciones asimismo han

demostrado que las personas sin seguro privado complementario y las empleadas en trabajos manuales acuden menos veces al especialista (17,18), y probablemente también al psiquiatra, que las que sí cuentan con seguro privado o un nivel socioeconómico más elevado. Al nivel contextual se ha supuesto que las personas que viven en las CA con mejores indicadores socioeconómicos, como sería un alto producto interno bruto (PIB), tendrían más probabilidades de acudir al psiquiatra. Los desequilibrios entre las CA en cuanto a distribución de recursos de salud mental (21,27-29) probablemente generen discordancias en el uso de servicios psiquiátricos, con independencia de las necesidades de los pacientes. Asimismo, también cabe esperar que las diferencias entre las CA en cuanto a la organización de los servicios de salud mental (27) y el modelo de integración de la atención primaria con la especializada en salud mental produzcan asimetrías en el acceso y el uso de estos servicios.

Por consiguiente, el objetivo de este estudio fue analizar las desigualdades individuales y contextuales en el uso de los servicios psiquiátricos en España, un país con un sistema de salud regionalizado y una integración variable de la atención primaria con la de salud mental.

## **Métodos**

Este fue un estudio transversal para analizar los datos individuales recopilados por la Encuesta Nacional de Salud de España (ENSE) en 2006 y los datos contextuales procedentes de las 17 CA españolas.

### *Población, muestra y recopilación de datos del estudio*

La población del estudio fue la población no institucionalizada (personas residentes en sus domicilios) de España que participó en la ENSE (Encuesta Nacional de Salud de España) de 2006. La encuesta poseía un diseño multifásico con estratificación de muestras representativas de las 17 CA. Las unidades de la primera fase fueron los distritos censales. Las unidades de la segunda fase fueron los hogares familiares, y dentro de cada hogar se eligió un adulto (edad  $\geq 16$  años) para responder el cuestionario. La muestra elegida contaba con alrededor de 31,300 hogares de 2,236 distritos censales. Se entrevistó al 96% de la muestra teórica. En total fueron entrevistadas 29,478 personas de  $\geq 16$  años. Los datos se recopilaron mediante entrevistas presenciales domiciliarias entre junio de 2006 y junio de 2007 (30).

### *Variable dependiente*

La variable dependiente fue la visita auto-reportada a un psiquiatra en las cuatro semanas previas (sí o no).

### *Variables independientes*

*Variables individuales.* Las variables explicativas a nivel individual fueron: sexo; edad (16 - 34, 35 - 64 y  $\geq 65$ ); clase social, asignada en función de la ocupación de nivel más alto de la casa (encuestado, cónyuge o persona con el salario más elevado) y agrupada en trabajos manuales y no manuales conforme a la adaptación española de la *British Register General Classification* (31), de uso muy extendido; cobertura de seguro médico, clasificado en exclusivamente público o público con seguro privado complementario (público y privado); país de nacimiento, clasificado en países de altos ingresos (como España y otros países de la Unión Europea) y países de bajos ingresos (aquellos con un índice de desarrollo humano  $< 0.9$  según el Programa de las Naciones Unidas para el Desarrollo), y necesidad de atención de salud mental, que se valoró con la versión de 12 rubros del Cuestionario de Salud General (GHQ-12 – *General Health Questionnaire*), un instrumento de escrutinio que se usa para detectar síntomas de malestar psicológico en curso y para el que se ha propuesto un punto de corte de  $\geq 3$  puntos (32,33) con el fin de detectar a las personas con trastornos psíquicos. La escala GHQ-12 se usó para controlar la necesidad de servicios de salud. (Las personas nacidas en la Unión Europea, aparte de España, y las de otros países de altos ingresos se agruparon porque tenían características parecidas a las de los españoles y fueron solamente el 2% de la muestra).

*Variables contextuales.* El PIB hace referencia al valor de mercado de todos los productos y servicios generados por un país durante un periodo dado y a menudo se expresa como PIB *per cápita* para efectos comparativos (el índice de España es de 100). Los datos de 2009 se obtuvieron a partir del Observatorio Social de España ([www.observatoriosocial.org/ose/index.html](http://www.observatoriosocial.org/ose/index.html)), que a su vez los había adquirido del Instituto Nacional de Estadística.

El coeficiente de Gini mide la equidad en los ingresos (34). El cero corresponde a una equidad de ingresos perfecta y el 100 a una inequidad de ingresos perfecta. El origen de la información fue la Encuesta de Estructura Salarial de 2006 y los datos se obtuvieron a través del Observatorio Social de España ([www.observatoriosocial.org/ose/index.html](http://www.observatoriosocial.org/ose/index.html)). Servicios de salud mental prestados por las CA.

Los datos referentes al número de psiquiatras, psicólogos y enfermeros psiquiátricos que trabajaban en los servicios públicos de salud mental en 2009, por cada 100,000 habitantes, se obtuvieron por cada CA del Observatorio de Salud Mental ([www.observatorio-aen.es](http://www.observatorio-aen.es)). Los datos sobre la cantidad de psiquiatras que laboraban en hospitales en 2000 - 2004, por cada 100,000 habitantes, se obtuvieron a partir del trabajo de Herrero y Santamera (28). Los datos relativos al número de camas disponibles para los pacientes psiquiátricos en 2000 - 2004 en centros que no fueran hospitales psiquiátricos, por cada 10,000 habitantes, se obtuvieron de Herrero y Santamera (28). Las CA se clasificaron según contaran con regímenes de financiamiento específicos para servicios de salud mental (no, parcialmente y sí), con datos de 2010 del Observatorio de Salud Mental. Dependiendo de la descripción de los planes de salud mental de cada CA (20) y de los datos aportados por el Observatorio de Salud Mental, existen dos modelos de coordinación entre la atención primaria y la especializada en salud mental: la derivación y el enlace. El nivel de coordinación es menor en el modelo de derivación y mayor en el de enlace.

### *Análisis de los datos*

En primer lugar realizamos un análisis descriptivo de la muestra, incluso con un resumen de la proporción de individuos que habían acudido a un psiquiatra, estratificado en función de las características individuales; comprobamos las diferencias entre estratos mediante la prueba de chi cuadrada. En segundo lugar llevamos a cabo un análisis ecológico para describir la distribución de las variables contextuales y la proporción de personas que habían acudido al psiquiatra en cada una de las 17 CA. Las distribuciones de las variables contextuales (cuartiles) se expresaron de manera cartográfica.

Finalmente efectuamos un análisis de regresión logística de varios niveles para obtener cálculos precisos de los efectos fijos (coeficientes de regresión o razones de momios [OR]) y

los errores habituales, teniendo al mismo tiempo en cuenta la estructura agrupada de los datos (en términos tanto individuales como regionales o de nivel 1 y nivel 2, respectivamente) para alcanzar estimaciones exactas de los efectos fijos (los habituales coeficientes de regresión u OR y los errores). El análisis “multinivel” aportó estimaciones de la variabilidad interregional a través del componente aleatorio del modelo. Se adoptó una estrategia de modelado secuencial en cuatro fases (35). Se usó un modelo incondicional o vacío que no contenía factores de predicción en ninguno de los dos niveles, pero sí un muestreo por intercepción aleatorio para comprobar si existía una variabilidad significativa ( $\tau^2$ ) interregional. El modelo individual era una simple extensión del modelo vacío en que se incluían las características individuales. Los diferentes modelos contextuales consistían en una extensión del modelo individual con la inclusión de una sola variable contextual (diez modelos) con el fin de analizar las asociaciones con las variables contextuales. El modelo “multinivel” contenía todas las variables individuales y contextuales. Para medir la variabilidad entre regiones se calcularon tanto el coeficiente de correlación intragrupal del modelo incondicional como el cambio proporcional de la varianza ( $\tau^2$ ) entre estos cuatro modelos anidados (35).

Todos los análisis incluyeron ponderaciones derivadas del complejo diseño de la muestra (36). En el método de estimación se contemplaron los procedimientos de aproximación de segundo orden y cuasi-verosimilitud penalizada. Todos los análisis estadísticos se realizaron con el programa informático Stata, versión 10.1, y el HLM 6.02 (37).

El estudio fue aprobado por el Comité Ético de Investigación Clínica de CEIC-Parc de Salut Mar. Todos los participantes otorgaron su consentimiento informado por escrito.

## **Resultados**

La proporción de individuos que habían acudido a un psiquiatra (0.55%,  $N = 161$ ) se muestra en la Tabla 1. Las personas con más probabilidades de haber consultado a un psiquiatra eran las de 35 a 64 años (0.8%,  $p < 0.001$ ) y aquellas con puntuaciones en GHQ-12 que indicaban la necesidad de recibir atención mental (2.0%,  $p < 0.001$ ). Fue menos probable que los inmigrantes de países de bajos ingresos hubieran acudido al psiquiatra (0.06%,  $p < 0.055$ ). No

se observaron diferencias significativas en cuanto a proporción de visitas en función de la clase social y del tipo de seguro médico.

Observamos diferencias significativas entre las CA en cuanto a la utilización de servicios de psiquiatría y la proporción de consultas osciló entre el 0.15% y el 0.96% (Tabla 2). También observamos diferencias entre las CA en cuanto a la distribución de variables contextuales. El PIB *per cápita* variaba de 72.3 a 133.7 con respecto al PIB nacional de 100. El coeficiente de Gini variaba entre 28.7 y 38.1. El nivel de recursos humanos dedicados a los servicios de salud mental, incluidos psiquiatras, psicólogos y enfermeros psiquiátricos, mostró más variación que el número de psiquiatras empleados en hospitales. En relación con el financiamiento específico para la salud mental, ocho CA (47%) carecían de presupuesto específico, cinco (29%) tenían solo un presupuesto parcial y cuatro (24%) contaban con dicho financiamiento específico. El modelo más frecuente de coordinación entre la atención primaria y la especializada en salud mental era el modelo de enlace, que funcionaba en 12 CA (77%); el modelo de derivación se usaba en cinco CA (24%). (En un suplemento de este artículo en línea se incluyen los mapas que ilustran la variación de las consultas a psiquiatras y las demás variables).

Los resultados del análisis “multinivel” de las consultas psiquiátricas se muestran en la Tabla 3. En el primer modelo, la edad inferior a 65 años, el país de origen de altos ingresos y la puntuación GHQ-12 positiva predijeron visitas más frecuentes al psiquiatra. El segundo modelo incluyó todas las variables individuales junto a cada variable contextual. Las limitaciones de espacio no permiten describir los resultados de cada variable individual; sólo se describe la variación que explican las variables contextuales. Se hallaron diferencias entre los modelos 2 y 3 porque las variables incluidas en los mismos no eran iguales. La frecuencia de visitas al psiquiatra era mayor en las CA que utilizaban el modelo de enlace y en aquellas con mayor número de psiquiatras empleados en hospitales. En el tercer modelo se observaron más visitas al psiquiatra en las CA con más recursos humanos de salud mental (OR = 1.03), más psiquiatras hospitalarios (OR = 1.47) y mejor coordinación entre la atención primaria y la especializada en salud mental (OR = 1.90). Al nivel individual, las personas menores de 65 años (16 - 34 años, OR = 2.51; 35 - 64 años, OR = 4.85) y aquellas con una puntuación GHQ-12 que indicaba la necesidad de los servicios de salud mental (OR = 16.2) tenían más probabilidades de haber acudido a un psiquiatra en el mes anterior. Además, era menos

probable que los inmigrantes de países de bajos ingresos hubieran acudido al psiquiatra ( $OR = 0.09$ ). En los modelos 1 y 3, la edad, el país de origen, la puntuación en GHQ-12, el nivel de recursos humanos (número de psiquiatras, psicólogos y enfermeros psiquiátricos), la cifra de psiquiatras que trabajan en hospitales por habitante y la coordinación entre la atención primaria y la especializada de salud mental se asociaron a una mayor probabilidad de haber acudido a un psiquiatra. En términos de visitas al psiquiatra, la variación explicada por las variables individuales y contextuales entre el modelo 1 ( $\tau^2=13,042$ ,  $p = 0.005$ ) y el modelo 3 ( $\tau^2=0.00005$ ,  $p < 0.001$ ) fue del 99%.

## **Discusión**

Observamos desigualdades individuales y contextuales en el uso de servicios de psiquiatría con independencia de los requerimientos de los pacientes, lo que confirmó muchos aspectos de la hipótesis de este estudio. Las probabilidades de reportar una visita al psiquiatra fueron menores entre las personas de más edad ( $\geq 65$  años) y los inmigrantes de países de bajos ingresos. Las variables regionales contextuales, como tener más recursos humanos de salud mental (psiquiatras, psicólogos y enfermeros psiquiátricos), más psiquiatras trabajando en hospitales y mejor coordinación entre la atención primaria y la especializada en salud mental, se asociaron a una mayor probabilidad de haber acudido a un psiquiatra. Una gran proporción de la variación en el uso de servicios de psiquiatría quedó explicada por las variables individuales y contextuales incluidas en el modelo final.

Al nivel individual, las personas más jóvenes tenían más probabilidades de haber acudido a un psiquiatra, lo que coincide con los resultados de otros estudios (9-11). La necesidad de tratamiento no satisfecha es mayor en los grupos tradicionalmente más desfavorecidos, como la población anciana y las minorías étnico-raciales (10). Nuestros resultados son similares a los de estudios realizados en otros países, que examinaron variables sociodemográficas a escala individual y que encontraron que los grupos más vulnerables eran los que tenían más necesidad de servicios de salud mental y menos acceso a los mismos (3,7,10,13,38,39). Más aún, los inmigrantes de países de bajos ingresos tenían pocas probabilidades de acudir a un psiquiatra a pesar del acceso universal al sistema sanitario español, hallazgo que también coincide con los resultados de ensayos precedentes (14,15). Estas menores tasas de uso podrían reflejar obstáculos culturales y lingüísticos para acceder a la atención a la salud (14), la

estigmatización de las personas con trastornos mentales en la cultura de origen (40) o la discriminación de los inmigrantes en España, incluida la falta de confianza de éstos en el sistema (41). Sin embargo, nuestra hipótesis inicial, que las desigualdades se asociarían al seguro médico y la clase social, no se vio respaldada por los resultados. Las personas con puntuaciones GHQ-12 indicativas de necesidad de servicios de salud mental tenían más probabilidades de referir que habían acudido a un psiquiatra, lo que coincide con informes anteriores (11,12).

Hallamos que la proporción de personas que reportaban haber acudido al psiquiatra era mayor en las CA con más recursos de salud mental. Estos resultados confirman que la distribución desigual de los recursos entre las CA (21,27,28) genera desigualdad en los niveles de acceso a los psiquiatras independientemente de las necesidades de los pacientes. Un objetivo importante de la reforma psiquiátrica en España es el de aumentar los recursos de salud mental al nivel de clínicas comunitarias. De los resultados de este estudio puede concluirse que las diferencias entre CA en cuanto a distribución de recursos de salud mental se asocian a desigualdades en el acceso a las consultas psiquiátricas. Estas inequidades tienen varias explicaciones posibles, como la falta de recursos, que produce largas listas de espera, y el miedo de los pacientes a no conseguir atención oportuna y a no ser recibidos por el especialista, aun en caso de acudir al hospital.

Los resultados de este estudio confirman la hipótesis de que las diferencias entre CA en términos de organización de planes de salud mental (27) y de modelo de integración de la atención primaria con la especializada de salud mental generan desigualdades entre dichas CA. Fue mayor la proporción de personas que reportaron haber acudido al psiquiatra en las CA que han adoptado el modelo de enlace en lugar del modelo de derivación; en el modelo de enlace, la atención primaria y la atención especializada en salud mental están mejor coordinadas. Se ha publicado que la integración de estos dos niveles de atención puede aumentar la calidad asistencial, facilitar el acceso a la atención mental especializada (24-26), mejorar la confianza entre paciente y profesional, así como aumentar la confianza del paciente en que recibirá una atención de calidad por parte de un especialista en salud mental. Nuestros resultados indican que la coordinación entre la atención primaria y la especializada de salud mental es un ejemplo de la mejor práctica en las políticas del sector. A las CA españolas que actualmente no observan estas políticas podría convenirles adoptarlas para poder mejorar el

acceso y la utilización de los servicios de salud mental entre los grupos con ingresos bajos. Esta recomendación parece especialmente oportuna en vista de los recortes que los servicios de salud del país experimentan actualmente por motivos de austeridad.

Algunos estudios han demostrado que las poblaciones que sufren privaciones socioeconómicas tienden a tener más necesidades de atención mental (40) y un menor acceso a la misma (7). Sin embargo, en términos de uso de servicios psiquiátricos, las variables asociadas a la disponibilidad de profesionales de salud mental y a la integración de la atención primaria con la especializada en salud mental fueron más importantes que las variables individuales y que las demás variables contextuales de carácter socioeconómico en nuestro estudio.

Este estudio presentó varias limitaciones. En primer lugar, respecto a la variable dependiente se registraron las consultas psiquiátricas acaecidas en un periodo breve de exclusivamente cuatro semanas antes de la entrevista, lo que podría explicar el escaso porcentaje de visitas. En segundo lugar, la información recogida se limitó a las consultas psiquiátricas únicamente, mientras que la necesidad de atención mental puede satisfacerse accediendo a otros profesionales de la salud, como los psicólogos o, más a menudo, los médicos generales. Las visitas al psicólogo no se tuvieron en cuenta en nuestro estudio; las visitas al médico de cabecera sí se incluyeron, aunque sin registrar el motivo concreto de la consulta.

La principal virtud de nuestro estudio fue la comparación entre regiones (CA) con diferentes situaciones económicas, planes de salud mental y recursos humanos y presupuestarios para este tipo de atención. Nuestros resultados indican que determinadas características de la red de salud mental de cada región se asocian al uso de los servicios psiquiátricos. La diversidad de las CA genera desigualdades, e identificar las variables que explican estas inequidades entre las distintas CA en cuanto al uso de servicios podría servir para desarrollar estrategias capaces de reducirlas. Estos resultados pueden servir de anteproyecto para los otros países que estén explorando qué características de las redes de servicios de salud mental son las que facilitan el acceso a los psiquiatras.

## Conclusiones

Nuestros hallazgos prueban que existen desigualdades sociales relacionadas al uso de los servicios psiquiátricos en España. Se observa que los grupos más vulnerables, como los ancianos y los inmigrantes, tienen más necesidades, pero peor acceso. Los resultados subrayan la necesidad de desarrollar políticas de salud mental que actúen de forma concreta sobre los grupos más vulnerables de la población española (42).

Nuestros resultados mostraron desequilibrios entre las CA españolas en cuanto al acceso a la atención psiquiátrica. La proporción de personas que habían acudido a un psiquiatra era mayor en las CA que emplean el modelo de enlace, en que la atención primaria y la atención especializada en salud mental están mejor integradas. Estudios futuros podrían evaluar la proporción de consultas por problemas de salud mental en los distintos niveles asistenciales – atención primaria, especializada y hospitalaria–, y las diferencias entre CA en términos de la idoneidad del tratamiento.

Es más, la mayor disponibilidad de recursos humanos de salud mental –psiquiatras, psicólogos, enfermeros psiquiátricos y otros profesionales de este campo–, y la superior disponibilidad de servicios de salud mental ambulatorios se asociaron a que fuera mayor el porcentaje de la población que había acudido al psiquiatra.

Entre las posibles soluciones para reducir estas desigualdades podrían estar el desarrollo de políticas de salud mental específicas para los grupos más vulnerables, la aplicación de modelos de derivación con mejor integración de la atención primaria con la especializada en salud mental y una mayor disponibilidad de profesionales de salud mental.

## *Agradecimientos y declaración de conflictos de intereses*

Este proyecto estuvo parcialmente financiado por el Plan Nacional de Investigación Científica, Desarrollo e Innovación Tecnológica (Plan Nacional de I+D+i 2008-2011); por la Subdirección General de Evaluación y Fomento de la Investigación, Instituto de Salud Carlos III (PI09/90676), y por el premio Enrique Nájera de la Sociedad Española de Epidemiología.

Los autores declaran que carecen de conflictos de intereses.

## *Referencias*

1. Investing in Mental Health. Geneva, World Health Organization, Department of Mental Health and Substance Abuse, 2003
2. Sabes-Figuera R, Knapp M, Bendeck M, et al: The local burden of emotional disorders: an analysis based on a large health survey in Catalonia [in Spanish]. *Gaceta Sanitaria* 26:24–29, 2012
3. Codony M, Alonso J, Almansa J, et al: Perceived need for mental health care and service use among adults in Western Europe: results of the ESEMeD project. *Psychiatric Services* 60:1051–1058, 2009
4. Bijl RV, Ravelli A: Psychiatric morbidity, service use, and need for care in the general population: results of the Netherlands Mental Health Survey and Incidence Study. *American Journal of Public Health* 90:602–607, 2000
5. Kovess-Masfety V, Alonso J, Brugha TS, et al: Differences in lifetime use of services for mental health problems in six European countries. *Psychiatric Services* 58:213–220, 2007
6. Kessler RC, McGonagle KA, Zhao S, et al: Lifetime and 12-month prevalence of DSM-III-R psychiatric disorders in the United States: results from the National Comorbidity Survey. *Archives of General Psychiatry* 51:8–19, 1994
7. Saxena S, Thornicroft G, Knapp M, et al: Resources for mental health: scarcity, inequity, and inefficiency. *Lancet* 370:878–889, 2007
8. Fernández A, Haro JM, Codony M, et al: Treatment adequacy of anxiety and depressive disorders: primary versus specialised care in Spain. *Journal of Affective Disorders* 96:9–20, 2006
9. Montilla JF, González C, Retolaza A, et al: Use of mental health services in Spain: resource consumption in the first year of assistance to new patients [in Spanish]. *Revista de la Asociación Española de Neuropsiquiatría* 84:25–47, 2002
10. Wang PS, Lane M, Olfson M, et al: Twelve-month use of mental health services in the United States: results from the National Comorbidity Survey Replication. *Archives of General Psychiatry* 62:629–640, 2005
11. Fleury M-J, Grenier G, Bamvita JM, et al: Comprehensive determinants of health service utilisation for mental health reasons in a Canadian catchment area. *International Journal for Equity in Health* 11:20–32, 2012

12. Ngamini Ngui A, Perreault M, Fleury M-J, et al: A multi-level study of the determinants of mental health service utilization. *Revue d'Epidemiologie et de Sante Publique* 60:85–93, 2012
13. Steele LS, Glazier RH, Lin E: Inequity in mental health care under Canadian universal health coverage. *Psychiatric Services* 57:317–324, 2006
14. Kirmayer LJ, Weinfeld M, Burgos G, et al: Use of health care services for psychological distress by immigrants in an urban multicultural milieu. *Canadian Journal of Psychiatry* 52:295–304, 2007
15. Stronks K, Ravelli AC, Reijneveld SA: Immigrants in the Netherlands: equal access for equal needs? *Journal of Epidemiology and Community Health* 55:701–707, 2001
16. Reverte-Cejudo D, Sánchez-Bayle M: Devolving health services to Spain's autonomous regions. *BMJ* 318:1204–1205, 1999
17. Borrell C, Fernandez E, Schiaffino A, et al: Social class inequalities in the use of and access to health services in Catalonia, Spain: what is the influence of supplemental private health insurance? *International Journal for Quality in Health Care* 13:117–125, 2001
18. Garrido-Cumbrera M, Borrell C, Palència L et al: Social class inequalities in the utilization of health care and preventive services in Spain, a country with a national health system. *Health Services* 40:525–542, 2010
19. Starfield B: *Primary Care: Balancing Health Needs*. New York, Oxford University Press, 1998
20. Mental Health Strategy of the National Health System, 2006 [in Spanish]. Madrid, Spain, Ministerio de Sanidad y Consumo, 2007. Available at [www.msc.es/organizacion/sns/planCalidadSNS/pdf/excelencia/salud\\_mental/ESTRATEGIA\\_SALUD\\_MENTAL\\_SNS\\_PAG\\_WEB.pdf](http://www.msc.es/organizacion/sns/planCalidadSNS/pdf/excelencia/salud_mental/ESTRATEGIA_SALUD_MENTAL_SNS_PAG_WEB.pdf)
21. Salvador-Carulla L, Costa-Font J, Cabases J, et al: Evaluating mental health care and policy in Spain. *Journal of Mental Health Policy and Economics* 13:73–86, 2010
22. Salvador-Carulla L, Bulbena A, Vázquez-Barquero JL, et al: *Mental Health in Spain: Cinderella in Wonderland* [in Spanish]. Barcelona, Spain, Sociedad Española de Salud Pública y Administración Sanitaria, 2002

23. WHO Atlas of Mental Health. Geneva, World Health Organization, 2005
24. Fortes S, Lopes CS, Villano LAB, et al: Common mental disorders in Petrópolis-RJ: a challenge to integrate mental health into primary care strategies. *Revista Brasileira de Psiquiatria* 33:150–156, 2011
25. Gask L, Croft J: Methods of working with primary care. *Advances in Psychiatric Treatment* 6:442–449, 2000
26. Levinson Miller C, Druss BG, Dombrowski EA, et al: Barriers to primary medical care among patients at a community mental health center. *Psychiatric Services* 54:1158–1160, 2003
27. Salvador-Carulla L, Garrido M, McDaid D, et al: Financing mental health care in Spain. *European Journal of Psychiatry* 20:29–44, 2006
28. Medel A, Sarria A: Hospital indicators by Regional Communities, 1980-2004 (longitudinal analysis of morbidity indicators and hospital staffing in mental health) [in Spanish]. *Actas Españolas de Psiquiatria* 37:82–93, 2009
29. Salvador-Carulla L, Saldivia S, Martinez-Leal R, et al: Meso-level comparison of mental health service availability and use in Chile and Spain. *Psychiatric Services* 59:421–428, 2008
30. Methodology of the National Health Survey 2006 [in Spanish]. Madrid, Spain, Ministerio de Sanidad y Consumo, 2007. Available at [www.msc.es/estadEstudios/estadisticas/encuestaNacional/encuesta2006.htm](http://www.msc.es/estadEstudios/estadisticas/encuestaNacional/encuesta2006.htm)
31. Domingo-Salvany A, Regidor E, Alonso J, et al: Proposal for a social class measure [in Spanish]. *Atencion Primaria* 25:350–363, 2000
32. McDowell I: *Measuring Health: A Guide to Rating Scales and Questionnaires*, 3rd ed. New York, Oxford University Press, 2006
33. Rocha KB, Pérez K, Rodríguez-Sanz M, et al: Psychometric properties and normative values of the General Health Questionnaire (GHQ-12) in the Spanish general population [in Spanish]. *International Journal of Clinical and Health Psychology* 11:125–139, 2011
34. Cowell FA: Inequality measurement: an axiomatic approach. *European Economic Review* 15:287–305, 1981

35. Merlo J, Yang M, Chaix B, et al: A brief conceptual tutorial on multilevel analysis in social epidemiology: investigating contextual phenomena in different groups of people. *Journal of Epidemiology and Community Health* 59:729–736, 2005
36. Carle AC: Fitting multilevel models in complex survey data with design weights: recommendations. *BMC Medical Research Methodology* 9:49, 2009
37. Raudenbush S, Bryk AS, Congdon R: HLM 6 for Windows. Lincolnwood, Ill, Scientific Software International, 2004
38. Rocha KB, Rodríguez-Sanz M, Pérez K, et al: Inequalities in the utilization of psychiatric and psychological services in Catalonia: a multilevel approach. *Administration and Policy in Mental Health* (Epub ahead of print June 12, 2012)
39. Diala CC, Muntaner C, Walrath C, et al: Racial/ethnic differences in attitudes toward seeking professional mental health services. *American Journal of Public Health* 91:805–807, 2001
40. Muntaner C, Eaton WW, Miech R, et al: Socioeconomic position and major mental disorders. *Epidemiologic Reviews* 26:53–62, 2004
41. Borrell C, Muntaner C, Gil-González D, et al: Perceived discrimination and health by gender, social class, and country of birth in a Southern European country. *Preventive Medicine* 50:86–92, 2010
42. Borrell C, Malmusi D, Artazcoz L, et al: A proposal of policies and interventions to reduce social inequalities in health in Spain [in Spanish]. *Gaceta Sanitaria* 26:182–189, 2012

Tabla 1

Características de los 29,478 participantes en la Encuesta Nacional de Salud de España de 2006 que consignaron la visita a un psiquiatra en el mes previo a la entrevista

| Característica         | Muestra total |      | Reportan una visita a un psiquiatra |       | p    |
|------------------------|---------------|------|-------------------------------------|-------|------|
|                        | N             | %    | N                                   | %     |      |
| Visita a un psiquiatra |               |      | 161                                 | .55   |      |
| Sexo                   |               |      |                                     |       | .48  |
| Varones                | 14,459        | 49.0 | 72                                  | .50   |      |
| Mujeres                | 15,019        | 51.0 | 89                                  | .59   |      |
| Edad (años)            |               |      |                                     |       | .001 |
| 16–34                  | 9,665         | 32.8 | 38                                  | .39   |      |
| 35–64                  | 14,094        | 47.8 | 110                                 | .78   |      |
| ≥65                    | 5,718         | 19.4 | 13                                  | .22*  |      |
| Clase social           |               |      |                                     |       | .23  |
| Trabajo no manual      | 11,665        | 4.4  | 59                                  | .51   |      |
| Trabajo manual         | 17,240        | 59.6 | 99                                  | .57   |      |
| Cobertura del seguro   |               |      |                                     |       | .97  |
| Público                | 23,439        | 8.1  | 128                                 | .54   |      |
| Público y privado      | 5,831         | 19.9 | 32                                  | .55   |      |
| País de origen         |               |      |                                     |       | .05  |
| Ingreso alto           | 26,375        | 89.7 | 159                                 | .60   |      |
| Ingreso bajo           | 3,022         | 1.3  | 2                                   | .06*  |      |
| GHQ-12 <sup>a</sup>    |               |      |                                     |       | .001 |
| Negativo               | 21,704        | 78.5 | 31                                  | .14   |      |
| Positivo               | 5,938         | 21.5 | 119                                 | 2.01* |      |

<sup>a</sup> Cuestionario de Salud General de 12 rubros. Una puntuación positiva (≥3 puntos) indica la presencia de malestar psicológico.

\* p<.01

Tabla 2

Distribución de variables contextuales entre las 17 Comunidades Autónomas de España

| Variable                                                        | Mínimo | Máximo | Percentil |      |       |
|-----------------------------------------------------------------|--------|--------|-----------|------|-------|
|                                                                 |        |        | 25º       | 50º  | 75º   |
| Consulta psiquiátrica                                           | .15    | .96    | .34       | .59  | .71   |
| Socioeconómico                                                  |        |        |           |      |       |
| Producto Interno Bruto <i>per capita</i> <sup>a</sup>           | 72.3   | 133.7  | 86.3      | 97.9 | 133.7 |
| Coefficiente de Gini <sup>b</sup>                               | 28.7   | 38.1   | 29.4      | 3.4  | 31.7  |
| Recursos humanos de salud mental por 100,000 habitantes         |        |        |           |      |       |
| N de personal <sup>c</sup>                                      | 3.4    | 34.7   | 16.1      | 18.1 | 23.8  |
| N de psiquiatras en hospitales                                  | 3.5    | 7.6    | 4.5       | 5.4  | 5.8   |
| N de camas de psiquiatría en otros centros por 1,000 habitantes | .4     | 2.9    | .6        | .9   | 2.9   |

<sup>a</sup> Índice de España=100

<sup>b</sup> Medida de la equidad en ingresos: 0=igualdad perfecta y 100=desigualdad perfecta

<sup>c</sup> Psiquiatras, psicólogos y enfermeros psiquiátricos

Tabla 3 Modelos de regresión de los factores que predicen la visita a un psiquiatra entre los participantes en la Encuesta Nacional de Salud de España de 2006<sup>a</sup>

| Variable                                                              | Modelo 1: todas las variables individuales |            | Modelo 2: variables individuales más cada variable contextual |            |                              | Modelo 3: variables individuales más contextuales |            |
|-----------------------------------------------------------------------|--------------------------------------------|------------|---------------------------------------------------------------|------------|------------------------------|---------------------------------------------------|------------|
|                                                                       | OR                                         | IC del 95% | OR                                                            | IC del 95% | Efectos aleatorios, $\sigma$ | OR                                                | IC del 95% |
| <b>Individuales</b>                                                   |                                            |            |                                                               |            |                              |                                                   |            |
| Mujeres (referencia: varones)                                         | 1.00                                       | .66–1.53   |                                                               |            |                              | 1.00                                              | .66–1.55   |
| Edad (referencia: $\geq 65$ )                                         |                                            |            |                                                               |            |                              |                                                   |            |
| 16–34                                                                 | 2.48*                                      | 1.42–4.33  |                                                               |            |                              | 2.51*                                             | 1.45–4.35  |
| 35–64                                                                 | 4.80*                                      | 2.99–7.72  |                                                               |            |                              | 4.85*                                             | 3.03–7.76  |
| Clase social: trabajos manuales (referencia: trabajos no manuales)    | 1.10                                       | .64–1.89   |                                                               |            |                              | 1.12                                              | .66–1.92   |
| Seguro: público y privado (referencia: solo público)                  | 1.09                                       | .57–2.07   |                                                               |            |                              | 1.00                                              | .51–1.98   |
| País de origen: ingresos bajos (referencia: ingresos altos)           | .09*                                       | .03–.29    |                                                               |            |                              | .09*                                              | .03–.27    |
| Escrutinio positivo con el GHQ-12 (referencia: negativa) <sup>b</sup> | 16.20*                                     | 9.63–27.2  |                                                               |            |                              | 16.2*                                             | 9.64–27.4  |
| <b>Contextuales (socioeconómicas)</b>                                 |                                            |            |                                                               |            |                              |                                                   |            |
| Producto Interno Bruto                                                |                                            |            | 1.00                                                          | .99–1.02   | .132*                        |                                                   |            |
| Gini <sup>c</sup>                                                     |                                            |            | 1.07                                                          | .94–1.20   | .135*                        | 1.06                                              | .99–1.12   |
| <b>Salud mental</b>                                                   |                                            |            |                                                               |            |                              |                                                   |            |
| Human resources                                                       |                                            |            |                                                               |            |                              |                                                   |            |
| N de personal <sup>d</sup>                                            |                                            |            | .99                                                           | .96–1.02   | .141*                        | 1.03*                                             | 1.01–1.06  |
| N de psiquiatras en hospitales                                        |                                            |            | 1.29*                                                         | 1.05–1.58  | .017*                        | 1.47*                                             | 1.18–1.83  |
| N de camas psiquiátricas en otros ámbitos                             |                                            |            | 1.15                                                          | .79–1.68   | .156*                        |                                                   |            |
| Organización                                                          |                                            |            |                                                               |            |                              |                                                   |            |
| Modelo coordinador de enlace (referencia: modelo de derivación)       |                                            |            | 1.68*                                                         | .98–2.89   | .119*                        | 1.90*                                             | 1.32–2.76  |
| Financiamiento específico de la salud mental (referencia: no)         |                                            |            |                                                               |            |                              |                                                   |            |
| Parcial                                                               |                                            |            | .69                                                           | .34–1.40   | .119*                        |                                                   |            |
| Sí                                                                    |                                            |            | 1.20                                                          | .71–2.05   | .119*                        |                                                   |            |

<sup>a</sup> Modelo 1:  $\tau^2=0.13042$ ,  $p=0.005$ ; modelo 3:  $\tau^2=0.00005$ ,  $p=0.04$ . Cambio proporcional de la varianza en los modelos 1 y 3=99%

<sup>b</sup> Cuestionario de Salud General de 12 rubros. Las puntuaciones  $\geq 3$  puntos (positivas) se usaron como indicativas de la presencia de malestar psicológico.

<sup>c</sup> Medida de la equidad de ingresos

<sup>d</sup> Psiquiatras, psicólogos y enfermeros psiquiátricos

\* $p < 0.01$
